# Supplementary material for: Sex Bias and Maternal Contribution to Gene Expression Divergence in Drosophila Blastoderm Embryos
Source: PubMed Central journal article supplement (PMC4618353; doi:10.1371/journal.pgen.1005592), 2015-10-20
Supplement: pgen.1005592.s008.pdf [file pgen.1005592.s008.pdf]

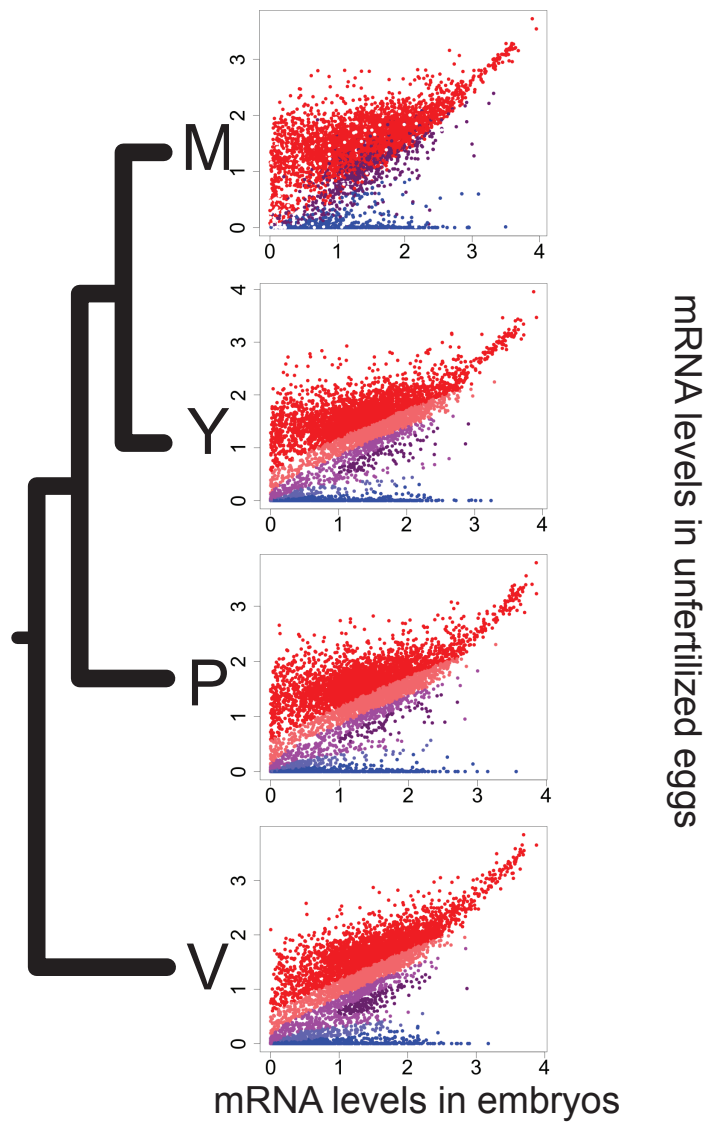

- Maternal, high probability
- Maternal, low probability
- Mat-Zyg, high probability
- Mat-Zyg, low probability
- Zygotic, high probability
- Zygotic, low probability
