# Supplementary material for: Sex Bias and Maternal Contribution to Gene Expression Divergence in Drosophila Blastoderm Embryos
Source: PubMed Central journal article supplement (PMC4618353; doi:10.1371/journal.pgen.1005592), 2015-10-20

A

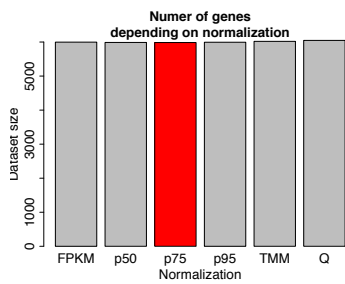

B

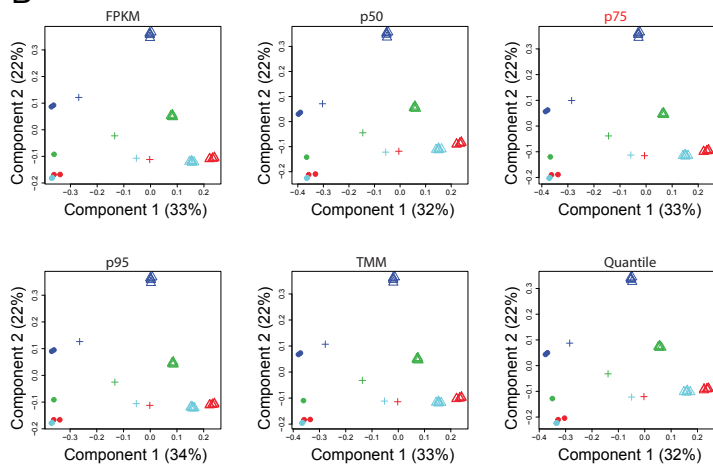

C

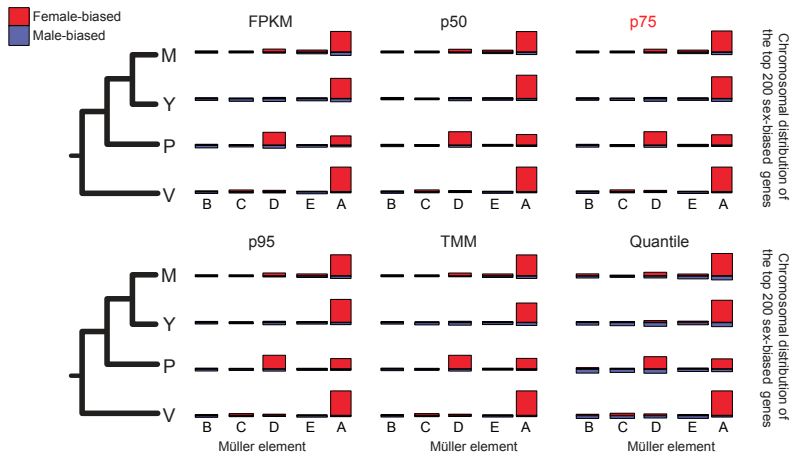

D

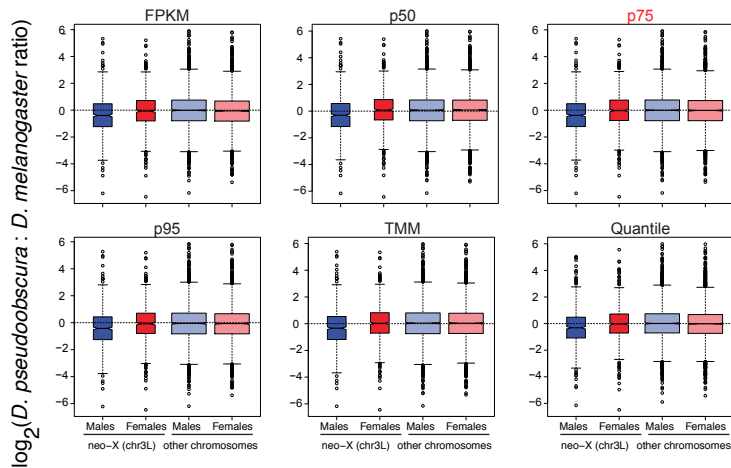

Supplement: pgen.1005592.s010.pdf [file pgen.1005592.s010.pdf]
